# Supplementary material for: Tandem Förster resonance energy transfer induced visual ratiometric fluorescence sensing of tetracyclines based on zeolitic imidazolate framework-8 incorporated with carbon dots and safranine T
Source: Royal Society of Chemistry journal article supplement (doi:10.1039/d1an01994e), 2022-01-01
Supplement: d1an01994e1.pdf [file d1an01994e1.pdf]

## Supporting Information

**Tandem Förster resonance energy transfer induced visual ratiometric  
fluorescence sensing for tetracyclines based on zeolitic imidazolate framework-8  
incorporated with carbon dots and safranin T**

Xiangying Sun<sup>a\*</sup>, Xiaolin Xin<sup>b</sup>, Wei He<sup>a</sup>, Xuegong Cao<sup>a</sup>, Jiangshan Shen<sup>a</sup>

## Figure

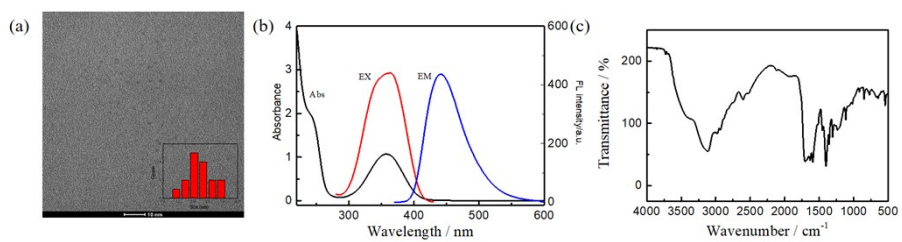

Fig.S1 (a)TEM images and particle size distribution(inset) of the CDs; (b) UV-vis absorption spectra(black), FL excitation spectra(red) and FL emission spectra(blue) of CDs. (c) FT-IR spectra of CDs

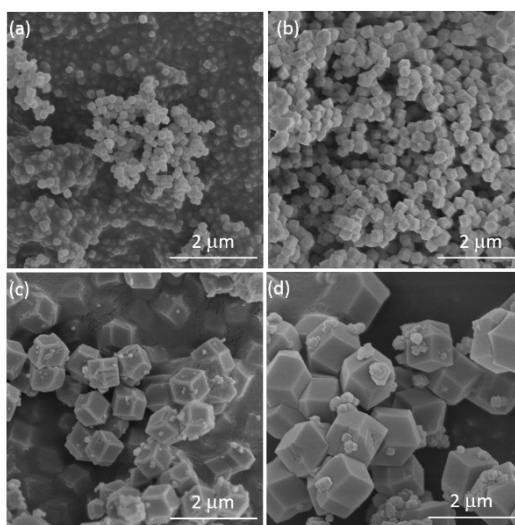

Fig. S2. SEM images of the CDs/ST@ZIF-8 synthesised with different amount of CDs (a) CDs 1/ST@ZIF-8, (b) CDs 2/ST@ZIF-8, (c) CDs 4/ST@ZIF-8, (d) CDs 8/ST@ZIF-8

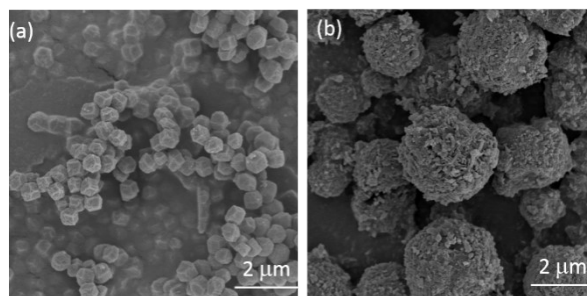

Fig. S3. SEM images of (a) CDs2/ST@ZIF-8, (b) CDs4/ST@ZIF-8 prepared with 25% methanol content in the methanol-water mixed solvent

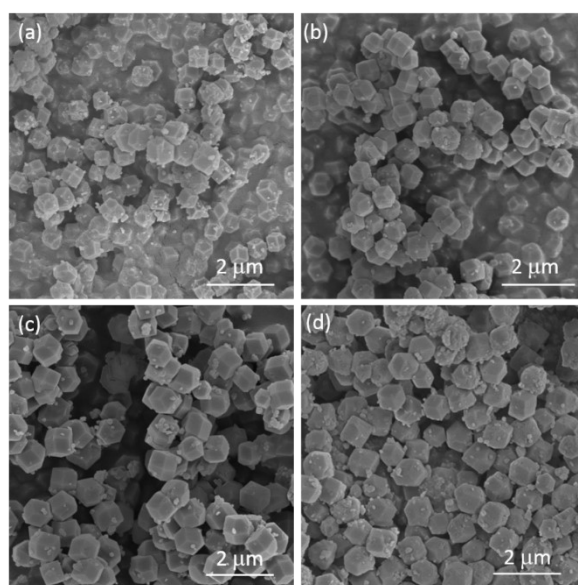

Fig. S4. SEM images of (a) CDs/ST1@ZIF-8, (b) CDs/ST2@ZIF-8, (c) CDs/ST4@ZIF-8, (d) CDs/ST8@ZIF-8

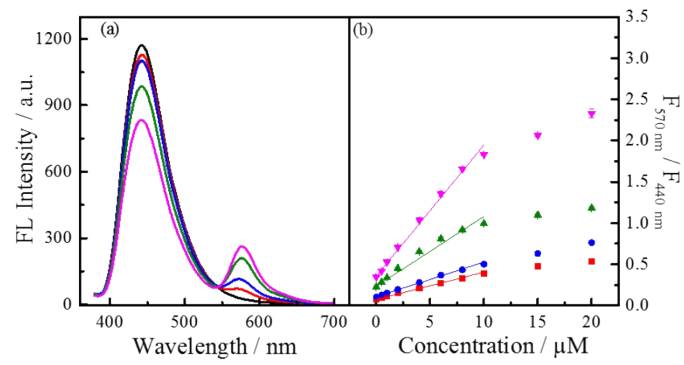

Fig. S5. (a) Fluorescence spectra and (b) the relationship curve between  $F_{570\text{ nm}}/F_{440\text{ nm}}$  and tetracycline concentration  
 CDs@ZIF-8(black), CDs/ST1@ZIF-8(red), CDs/ST2@ZIF-8(blue), CDs/ST4@ZIF-8(green) and CDs/ST8@ZIF-8(pink)

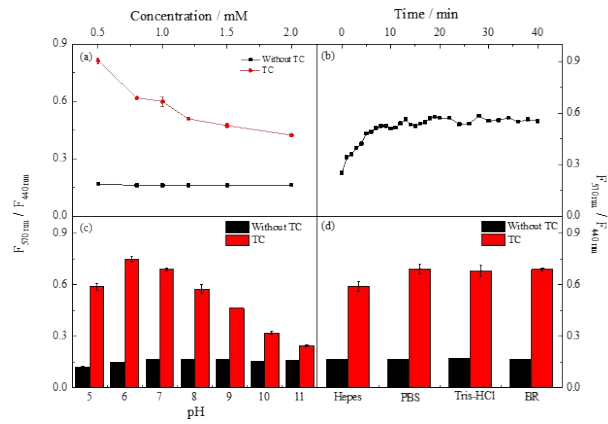

Fig. S6. Effect on fluorescence sensing system (containing 20  $\mu\text{M}$  tetracycline hydrochloride) (a) probe concentration, (b) response time,  
 (c) pH, (d) buffer type

## Tables

Table S1. Response of different probes to tetracycline

| Probe          | Linear equation                                          | Linear range         | R <sup>2</sup> |
|----------------|----------------------------------------------------------|----------------------|----------------|
| CDs@ZIF-8      | $F_0 - F / F_0 = 0.0480C - 0.00343$                      | 1.0~10 $\mu\text{M}$ | 0.992          |
| CDs/ST 1@ZIF-8 | $F_{570\text{nm}} / F_{440\text{nm}} = 0.0331C + 0.0739$ | 0.5~10 $\mu\text{M}$ | 0.995          |
| CDs/ST 2@ZIF-8 | $F_{570\text{nm}} / F_{440\text{nm}} = 0.0420C + 0.108$  | 0.5~10 $\mu\text{M}$ | 0.994          |
| CDs/ST 4@ZIF-8 | $F_{570\text{nm}} / F_{440\text{nm}} = 0.0845C + 0.234$  | 0.5~10 $\mu\text{M}$ | 0.991          |
| CDs/ST 8@ZIF-8 | $F_{570\text{nm}} / F_{440\text{nm}} = 0.159C + 0.357$   | 0.5~10 $\mu\text{M}$ | 0.995          |

Table S2 Comparison of CDs/ST@ZIF-8 with different methods for the detection of tetracycline

| Sensor                                                  | Linear range           | LOD                 | Ref.      |
|---------------------------------------------------------|------------------------|---------------------|-----------|
| CDs                                                     | 10-400 $\mu\text{M}$   | 6.0 $\mu\text{M}$   | [1]       |
| N-CQDs                                                  | 3.3-32.3 $\mu\text{M}$ | 0.746 $\mu\text{M}$ | [2]       |
| Tb(sbdc) <sub>1.5</sub> (H <sub>2</sub> O) <sub>2</sub> | 0-30 $\mu\text{M}$     | 0.28 $\mu\text{M}$  | [3]       |
| NH <sub>2</sub> -MIL-53(Al)                             | 0-86.67 $\mu\text{M}$  | 0.062 $\mu\text{M}$ | [4]       |
| BSA-AuNCs                                               | 0.2-10.0 $\mu\text{M}$ | 0.065 $\mu\text{M}$ | [5]       |
| CDs/ST@ZIF-8                                            | 0.2-10.0 $\mu\text{M}$ | 0.046 $\mu\text{M}$ | This work |

Table S3 Effect of interfering components on the detection of tetracycline

| Coexisting substance | Concentration ( $\mu\text{M}$ ) | Change of fluorescence intensity (%) | Coexisting substance | Concentration ( $\mu\text{M}$ ) | Change of fluorescence intensity (%) |
|----------------------|---------------------------------|--------------------------------------|----------------------|---------------------------------|--------------------------------------|
| Mg <sup>2+</sup>     | 100                             | 2.29                                 | Hg <sup>2+</sup>     | 20                              | 1.48                                 |
| Al <sup>3+</sup>     | 100                             | 8.90                                 | Arginine             | 100                             | -3.18                                |
| K <sup>+</sup>       | 100                             | 8.34                                 | Histidine            | 100                             | 8.78                                 |
| Na <sup>+</sup>      | 100                             | 6.88                                 | Lysine               | 100                             | -0.54                                |
| Ca <sup>2+</sup>     | 50                              | -5.58                                | Enrofloxacin         | 50                              | 4.26                                 |
| Cd <sup>2+</sup>     | 50                              | 3.01                                 | Furantone            | 50                              | 3.16                                 |
| Cr <sup>2+</sup>     | 50                              | 5.16                                 | Thiamphenicol        | 50                              | 0.23                                 |
| Mn <sup>2+</sup>     | 50                              | 5.22                                 | Metronidazole        | 50                              | 0.60                                 |

Table S4. Lifetime of CDs/ST@ZIF-8 system and energy transfer efficiency calculation

| System              | Lifetime of TC [ns]            | Lifetime of CDs<br>[ns]        | Energy transfer<br>efficiency ( $\Phi_{ET}$ )<br>[%] |
|---------------------|--------------------------------|--------------------------------|------------------------------------------------------|
| <b>ZIF-8</b>        | 1.509(a)                       |                                |                                                      |
| <b>CDs/ST@ZIF-8</b> |                                | 6.320                          |                                                      |
| <b>CDs/ST@ZIF-8</b> | 2.508(a)/1.996(b)/<br>1.614(c) | 5.408(a)/5.129(b)/<br>4.939(c) | 14.43(d)/39.83(e)                                    |

<sup>(a)(b)(c)</sup> represents the addition of TC 10, 20, 40  $\mu\text{M}$ , <sup>(d)</sup>  $\Phi_{ET}$  from CDs to TC, <sup>(e)</sup>  $\Phi_{ET}$  from TC to ST

Table S5. The detection of tetracycline of the tap water samples

| Spiked/ $\mu\text{M}$ | Detected/ $\mu\text{M}$ | Recovery % | RSD%(n=3) |
|-----------------------|-------------------------|------------|-----------|
| 1.00                  | 1.03                    | 103.3      | 0.30      |
| 2.00                  | 1.80                    | 90.1       | 1.28      |
| 4.00                  | 3.73                    | 93.3       | 0.74      |
| 10.0                  | 10.1                    | 101.3      | 1.40      |

## References

- [1] Y Yan, J H Liu, R S Li, Y F Li, C Z Huang, S J Zhen. Carbon dots synthesized at room temperature for detection of tetracycline hydrochloride. *Anal Chim Acta*, 1063(2019), pp. 144-151
- [2] H Qi, M Teng, M Liu, S Liu, J Li, H Yu, C Teng, Z Huang, H Liu, Q Shao, A Umar, T Ding, Q Gao, Z Guo. Biomass-derived nitrogen-doped carbon quantum dots: Highly selective fluorescent probe for detecting  $\text{Fe}^{3+}$  ions and tetracyclines. *J Colloid Interface Sci*, 539(2019), pp. 332-341
- [3] Q Liu, D Ning, W J Li, X M Du, Q Wang, Y Li, W J Ruan. Metal-organic framework-based fluorescent sensing of tetracycline-type antibiotics applicable to environmental and food analysis. *Analyst*, 144(2019), pp. 1916-1922
- [4] C Li, L Zhu, W Yang, X He, S Zhao, X Zhang, W Tang, J Wang, T Yue, Z Li. Amino-functionalized Al-MOF for fluorescent detection of tetracyclines in milk. *J Agric Food Chem*, 67(2019), pp. 1277-1283
- [5] L Meng, C Lan, Z Liu, N Xu, Y Wu. A novel ratiometric fluorescence probe for highly sensitive and specific detection of chlorotetracycline among tetracycline antibiotics. *Anal Chim Acta*, 1089(2019), pp. 144-151
